# Supplementary material for: Long-term outcomes for ibrutinib–rituximab and chemoimmunotherapy in CLL: updated results of the E1912 trial
Source: PubMed Central journal article supplement — Blood. 2022 Jul 14;140(2):112–20. doi: 10.1182/blood.2021014960 (PMC9283968; doi:10.1182/blood.2021014960), 2022-07-14

Supplemental Table 1: Baseline characteristics. Includes all randomized patients.

| Variable                      | Category           | A (IR)              | B (FCR)             | Total               |
|-------------------------------|--------------------|---------------------|---------------------|---------------------|
| Total <sup>1</sup>            |                    | 354                 | 175                 | 529                 |
| Age                           | Mean (SD)          | 56.7 (7.5)          | 56.7 (7.2)          | 56.7 (7.4)          |
|                               | Median (Q1,Q3)     | 58.0 (52.0,62.0)    | 57.0 (53.0,61.5)    | 58.0 (52.0,62.0)    |
|                               | [Min, Max]         | [31.0,70.0]         | [28.0,70.0]         | [28.0,70.0]         |
|                               | Freq. of Missing   | 0                   | 0                   | 0                   |
| Age, category                 | <60                | 209 (59.0)          | 105 (60.0)          | 314 (59.4)          |
|                               | >=60               | 145 (41.0)          | 70 (40.0)           | 215 (40.6)          |
|                               | Unknown/Missing    | 0                   | 0                   | 0                   |
| Gender                        | Female             | 118 (33.3)          | 55 (31.4)           | 173 (32.7)          |
|                               | Male               | 236 (66.7)          | 120 (68.6)          | 356 (67.3)          |
|                               | Unknown/Missing    | 0                   | 0                   | 0                   |
| Rai Stage                     | Low, 0             | 11 (3.1)            | 9 (5.1)             | 20 (3.8)            |
|                               | Intermediate, I-II | 187 (52.8)          | 94 (53.7)           | 281 (53.1)          |
|                               | High, III-IV       | 156 (44.1)          | 72 (41.1)           | 228 (43.1)          |
|                               | Unknown/Missing    | 0                   | 0                   | 0                   |
| CIRS                          | Mean (SD)          | 2.1 (2.3)           | 1.9 (1.9)           | 2.0 (2.2)           |
|                               | Median (Q1,Q3)     | 2 (0,3)             | 1 (0,3)             | 2 (0,3)             |
|                               | [Min, Max]         | [0,14]              | [0,9]               | [0,14]              |
|                               | Freq. of Missing   | 7                   | 5                   | 12                  |
| ECOG PS                       | 0                  | 226 (63.8)          | 109 (62.3)          | 335 (63.3)          |
|                               | 1                  | 119 (33.6)          | 63 (36.0)           | 182 (34.4)          |
|                               | 2                  | 9 (2.5)             | 3 (1.7)             | 12 (2.3)            |
|                               | Unknown/Missing    | 0                   | 0                   | 0                   |
| Creatinine Clearance (ml/min) | Mean (SD)          | 96.3 (6.8)          | 95.8 (5.8)          | 96.2 (6.5)          |
|                               | Median (Q1,Q3)     | 94.8 (91.9,98.9)    | 94.5 (92.2,98.0)    | 94.8 (91.9,98.5)    |
|                               | [Min, Max]         | [86.2,123.9]        | [86.8,117.9]        | [86.2,123.9]        |
|                               | Freq. of Missing   | 0                   | 0                   | 0                   |
| Hemoglobin g/dL               | Mean (SD)          | 12.2 (2.2)          | 12.1 (2.1)          | 12.1 (2.2)          |
|                               | Median (Q1,Q3)     | 12.3 (10.6,13.9)    | 12.4 (11.0,13.6)    | 12.4 (10.7,13.8)    |
|                               | [Min, Max]         | [4.4,17.5]          | [5.5,17.6]          | [4.4,17.6]          |
| Platelets 10 <sup>3</sup> /uL | Freq. of Missing   | 6                   | 3                   | 9                   |
|                               | Mean (SD)          | 158.3 (71.3)        | 157.3 (78.5)        | 158.0 (73.7)        |
|                               | Median (Q1,Q3)     | 150.0 (107.0,200.8) | 143.0 (102.0,193.5) | 148.0 (105.0,200.0) |
|                               | [Min, Max]         | [9.6,508.0]         | [13.0,485.0]        | [9.6,508.0]         |
| TUG (seconds)                 | Freq. of Missing   | 0                   | 0                   | 0                   |
|                               | Mean (SD)          | 8.7 (2.6)           | 8.6 (2.5)           | 8.6 (2.6)           |
|                               | Median (Q1,Q3)     | 9.0 (7.0,10.0)      | 8.0 (7.0,10.0)      | 8.0 (7.0,10.0)      |
|                               | [Min, Max]         | [2.0,27.0]          | [2.0,20.0]          | [2.0,27.0]          |
| Beta-2 Microglobulin          | Freq. of Missing   | 4                   | 5                   | 9                   |
|                               | Mean (SD)          | 4.0 (2.1)           | 4.0 (1.9)           | 4.0 (2.0)           |
|                               | Median (Q1,Q3)     | 3.6 (2.6,4.6)       | 3.4 (2.7,4.8)       | 3.6 (2.6,4.7)       |

|                                             |                                |                 |                 |                 |
|---------------------------------------------|--------------------------------|-----------------|-----------------|-----------------|
| mg/L                                        | [Min, Max]<br>Freq. of Missing | [1.3,14.4]<br>5 | [1.0,12.2]<br>0 | [1.0,14.4]<br>5 |
| Beta-2<br>Microglobulin                     | Elevated                       | 181 (51.9)      | 84 (48.0)       | 265 (50.6)      |
|                                             | Normal                         | 168 (48.1)      | 91 (52.0)       | 259 (49.4)      |
|                                             | Unknown/Missing                | 5               | 0               | 5               |
| Lymphadenopathy <sup>2</sup>                | No                             | 103 (29.1)      | 56 (32.0)       | 159 (30.1)      |
|                                             | Yes                            | 251 (70.9)      | 119 (68.0)      | 370 (69.9)      |
|                                             | Unknown/Missing                | 0               | 0               | 0               |
| Del(11q22.3)                                | Abnormal                       | 78 (22.2)       | 39 (22.3)       | 117 (22.2)      |
|                                             | Normal                         | 274 (77.8)      | 136 (77.7)      | 410 (77.8)      |
|                                             | Unknown/Missing                | 2               | 0               | 2               |
| Dohner<br>Classification<br>based on FISH   | del(17p)                       | 2 (0.6)         | 0 (0.0)         | 2 (0.4)         |
|                                             | del(11q22)                     | 78 (22.0)       | 39 (22.3)       | 117 (22.1)      |
|                                             | trisomy 12                     | 70 (19.8)       | 27 (15.4)       | 97 (18.3)       |
|                                             | normal                         | 69 (19.5)       | 37 (21.1)       | 106 (20.0)      |
|                                             | del(13q)                       | 121 (34.2)      | 58 (33.1)       | 179 (33.8)      |
|                                             | other                          | 14 (4.0)        | 14 (8.0)        | 28 (5.3)        |
|                                             | Unknown/Missing                | 0               | 0               | 0               |
| TP53 Mutation by<br>Sequencing <sup>4</sup> | Present                        | 27 (9.0)        | 4 (3.0)         | 31 (7.2)        |
|                                             | Absent                         | 272 (91.0)      | 130 (97.0)      | 402 (92.8)      |
|                                             | Unknown/Missing                | 55              | 41              | 96              |
| IGHV <sup>3</sup>                           | Mutated                        | 70 (25.0)       | 44 (38.3)       | 114 (28.9)      |
|                                             | Unmutated                      | 210 (75.0)      | 71 (61.7)       | 281 (71.1)      |
|                                             | Unable to<br>sequence          | 24              | 17              | 41              |
|                                             | Not tested                     | 50              | 43              | 93              |

<sup>1</sup> Including patients with small lymphocytic lymphoma (SLL); overall 11.4% of patients had SLL sub-type of CLL (IR: 11.7%; FCR 10.9%)

<sup>2</sup> As determined by physical exam.

<sup>3</sup> Tested in the 436 (82%) patients who agreed to participate in the correlative study component of the trial and provided a research sample.

<sup>4</sup> 433 patients who agreed to provide samples for research purposes underwent sequencing of TP53.

Supplemental Table 2: Second primary cancers seen in the two arms. Some patients had multiple second primary cancers.

|                                                          | <b>IR<br/>(n=352)</b> | <b>FCR<br/>(n=158)</b> |
|----------------------------------------------------------|-----------------------|------------------------|
| AML                                                      | 0                     | 1                      |
| Bladder                                                  | 0                     | 1                      |
| Brain tumor                                              | 4                     | 0                      |
| Breast                                                   | 4                     | 1                      |
| Colon                                                    | 1                     | 2                      |
| Diffuse Large B-cell Lymphoma (Richter's transformation) | 2                     | 1                      |
| Esophagus                                                | 1                     | 0                      |
| Gastric                                                  | 1                     | 0                      |
| Lung cancer                                              | 5                     | 2                      |
| Melanoma                                                 | 9                     | 1                      |
| Myelodysplastic syndrome                                 | 0                     | 2                      |
| Myeloproliferative disorder-essential thrombocythemia    | 1                     | 0                      |
| Pancreas adenocarcinoma/other                            | 1                     | 0                      |
| Pleomorphic rhabdomyosarcoma                             | 0                     | 1                      |
| Prostate                                                 | 8                     | 1                      |
| Thyroid                                                  | 2                     | 0                      |
| Skin cancer not melanoma                                 | 26                    | 6                      |
| Total unique patients developing second primary cancers  | 55                    | 17                     |

Supplemental Table 3a: Causes of Death

| <b>Cause of Death</b> | <b>IR<br/>(n=354)</b> | <b>FCR<br/>(n=175)</b> |
|-----------------------|-----------------------|------------------------|
| AML                   | 0                     | 3                      |
| Cardiac               | 1                     | 1                      |
| CLL                   | 5                     | 6                      |
| COVID-19              | 3                     | 0                      |
| Other cancer          | 5                     | 3                      |
| Other cause           | 2                     | 1                      |
| Other medical cause   | 3                     | 2                      |
| Sepsis                | 1                     | 1                      |
| Unknown               | 1                     | 1                      |
| <b>Total</b>          | <b>21</b>             | <b>18</b>              |

Other cancer: lung cancer (n=2, IR), brain cancer (n=2, IR), esophagus (IR), colon cancer (n=2, FCR), lung cancer (FCR). Other cause: suicide (IR), accident (IR), drug overdose (FCR). Other medical cause: acute respiratory failure (IR), pancreatitis (IR), stroke (IR), tumor lysis from venetoclax (FCR), GVHD (FCR).

Supplemental Table 3b: Salvage therapy for patients who died from CLL or Richter's Transformation.

| Patient | Arm | Salvage Therapy                                                                                           |
|---------|-----|-----------------------------------------------------------------------------------------------------------|
| 1*      | IR  | Rituximab                                                                                                 |
| 2       | IR  | 1. Bendamustine, 2. Obinutuzumab, 3. Idelalisib, 4. Obinutuzumab, 5. Acalabrutinib                        |
| 3       | IR  | 1. Obinutuzumab+Venetoclax, 2. BV-CHP, 3. Dexamethasone                                                   |
| 4       | IR  | 1. Venetoclax+Rituximab, 2. R-CHOP                                                                        |
| 5       | IR  | 1. Rituximab, 2. Cyclosporine, 3. Ibrutinib, 4. Ibrutinib+Venetoclax                                      |
| 6*      | FCR | 1. Bendamustine+Rituximab, 2. Rituximab, 3. Venetoclax                                                    |
| 7*      | FCR | None                                                                                                      |
| 8*      | FCR | 1. Ibrutinib, 2. Methylprednisolone + Rituximab, 3. Venetoclax 4. Methylprednisolone + Rituximab, 5. CHOP |
| 9*      | FCR | 1. Rituximab, 2. Bendamustine (1 cycle)                                                                   |
| 10      | FCR | None                                                                                                      |
| 11      | FCR | 1. Ibrutinib, 2. Obinutuzumab-EPOCH                                                                       |

\* Reported in Shanafelt et al NEJM 2018.

Supplemental Table 4. Adverse events of all grades regardless of treatment attribution.

| Toxicity Type                                         | Treatment Arm |       |       |         |           |       |       |   |
|-------------------------------------------------------|---------------|-------|-------|---------|-----------|-------|-------|---|
|                                                       | A (n=352)     |       |       |         | B (n=158) |       |       |   |
|                                                       | Grade         |       |       |         | Grade     |       |       |   |
| 1,2 (%)                                               | 3 (%)         | 4 (%) | 5 (%) | 1,2 (%) | 3 (%)     | 4 (%) | 5 (%) |   |
| Anemia                                                | 69            | 9     | -     | -       | 65        | 15    | 4     | - |
| Blood and lymphatic system disorders - Other, specify | 10            | <1    | -     | -       | 3         | 1     | -     | - |
| Febrile neutropenia                                   | -             | 2     | <1    | -       | -         | 13    | 3     | - |
| Hemolysis                                             | <1            | 1     | -     | -       | -         | 2     | 1     | - |
| Leukocytosis                                          | -             | 18    | <1    | -       | -         | 9     | -     | - |
| Lymph node pain                                       | 3             | -     | -     | -       | 3         | -     | -     | - |
| Spleen disorder                                       | -             | -     | -     | -       | 1         | -     | -     | - |
| Thrombotic thrombocytopenic purpura                   | <1            | -     | -     | -       | -         | -     | -     | - |
| Bone marrow hypocellular                              | <1            | -     | -     | -       | -         | -     | -     | - |
| Atrial fibrillation                                   | 7             | 4     | 1     | -       | 2         | 1     | 1     | - |
| Atrial flutter                                        | -             | 1     | -     | -       | -         | -     | -     | - |
| Atrioventricular block complete                       | -             | <1    | -     | -       | -         | -     | -     | - |
| Atrioventricular block first degree                   | -             | -     | -     | -       | 1         | -     | -     | - |
| Cardiac arrest                                        | -             | -     | 1     | <1      | -         | -     | -     | - |
| Cardiac disorders - Other, specify                    | 5             | <1    | -     | -       | 1         | -     | -     | - |
| Chest pain - cardiac                                  | 3             | 1     | -     | -       | 1         | -     | -     | - |
| Conduction disorder                                   | -             | <1    | -     | -       | -         | -     | -     | - |
| Constrictive pericarditis                             | -             | -     | -     | -       | -         | 1     | -     | - |
| Heart failure                                         | <1            | 1     | <1    | -       | -         | -     | -     | - |
| Palpitations                                          | 13            | -     | -     | -       | 3         | -     | -     | - |
| Pericardial effusion                                  | -             | 1     | -     | -       | -         | -     | -     | - |
| Pericarditis                                          | 1             | -     | -     | -       | -         | -     | -     | - |
| Sinus bradycardia                                     | 6             | 1     | -     | -       | 2         | -     | -     | - |
| Sinus tachycardia                                     | 6             | <1    | -     | -       | 4         | -     | -     | - |
| Supraventricular tachycardia                          | 1             | 1     | -     | -       | -         | -     | -     | - |
| Ventricular arrhythmia                                | 1             | -     | -     | -       | -         | -     | -     | - |

| Toxicity Type                                               | Treatment Arm |          |          |          |            |          |          |          |
|-------------------------------------------------------------|---------------|----------|----------|----------|------------|----------|----------|----------|
|                                                             | A (n=352)     |          |          |          | B (n=158)  |          |          |          |
|                                                             | Grade         |          |          |          | Grade      |          |          |          |
|                                                             | 1,2<br>(%)    | 3<br>(%) | 4<br>(%) | 5<br>(%) | 1,2<br>(%) | 3<br>(%) | 4<br>(%) | 5<br>(%) |
| Ventricular tachycardia                                     | <1            | <1       | -        | -        | -          | -        | -        | -        |
| Acute coronary syndrome                                     | 1             | -        | -        | -        | -          | 1        | -        | -        |
| Pericardial tamponade                                       | -             | -        | <1       | -        | -          | -        | -        | -        |
| Congenital, familial and genetic disorders - Other, specify | <1            | -        | -        | -        | -          | -        | -        | -        |
| Ear and labyrinth disorders - Other, specify                | 4             | -        | -        | -        | 2          | -        | -        | -        |
| Ear pain                                                    | 5             | <1       | -        | -        | 2          | -        | -        | -        |
| Hearing impaired                                            | 2             | 1        | -        | -        | 1          | -        | -        | -        |
| Tinnitus                                                    | 5             | -        | -        | -        | 3          | -        | -        | -        |
| Vertigo                                                     | 3             | -        | -        | -        | 1          | -        | -        | -        |
| Vestibular disorder                                         | <1            | -        | -        | -        | -          | -        | -        | -        |
| External ear inflammation                                   | 1             | -        | -        | -        | -          | -        | -        | -        |
| Middle ear inflammation                                     | 1             | -        | -        | -        | -          | -        | -        | -        |
| Cushingoid                                                  | -             | -        | -        | -        | 1          | -        | -        | -        |
| Endocrine disorders - Other, specify                        | 3             | -        | -        | -        | 1          | -        | -        | -        |
| Hyperparathyroidism                                         | 1             | -        | -        | -        | -          | -        | -        | -        |
| Hyperthyroidism                                             | 1             | -        | -        | -        | -          | -        | -        | -        |
| Hypothyroidism                                              | 3             | -        | -        | -        | -          | -        | -        | -        |
| Blurred vision                                              | 12            | -        | -        | -        | 3          | -        | -        | -        |
| Cataract                                                    | 2             | 1        | -        | -        | -          | -        | -        | -        |
| Conjunctivitis                                              | 5             | -        | -        | -        | -          | -        | -        | -        |
| Dry eye                                                     | 7             | -        | -        | -        | -          | -        | -        | -        |
| Eye disorders - Other, specify                              | 9             | <1       | -        | -        | 1          | -        | -        | -        |
| Eye pain                                                    | 3             | -        | -        | -        | -          | -        | -        | -        |
| Floaters                                                    | 1             | -        | -        | -        | -          | -        | -        | -        |
| Glaucoma                                                    | 1             | -        | <1       | -        | -          | -        | -        | -        |
| Night blindness                                             | <1            | -        | -        | -        | -          | -        | -        | -        |
| Photophobia                                                 | 1             | -        | -        | -        | -          | -        | -        | -        |
| Retinal detachment                                          | <1            | -        | -        | -        | -          | -        | -        | -        |
| Retinal tear                                                | -             | -        | <1       | -        | -          | -        | -        | -        |

| Toxicity Type             | Treatment Arm |          |          |            |           |          |          |   |
|---------------------------|---------------|----------|----------|------------|-----------|----------|----------|---|
|                           | A (n=352)     |          |          |            | B (n=158) |          |          |   |
|                           | Grade         |          |          |            | Grade     |          |          |   |
| 1,2<br>(%)                | 3<br>(%)      | 4<br>(%) | 5<br>(%) | 1,2<br>(%) | 3<br>(%)  | 4<br>(%) | 5<br>(%) |   |
| Retinal vascular disorder | <1            | -        | -        | -          | -         | -        | -        | - |
| Retinopathy               | <1            | -        | -        | -          | 1         | -        | -        | - |
| Uveitis                   | 1             | -        | -        | -          | -         | -        | -        | - |
| Vitreous hemorrhage       | 1             | -        | -        | -          | -         | -        | -        | - |
| Watering eyes             | 4             | -        | -        | -          | 1         | -        | -        | - |
| Optic nerve disorder      | -             | <1       | -        | -          | -         | -        | -        | - |
| Abdominal distension      | 3             | -        | -        | -          | 1         | -        | -        | - |
| Abdominal pain            | 20            | 2        | -        | -          | 9         | 1        | -        | - |
| Anal fistula              | <1            | <1       | -        | -          | -         | -        | -        | - |
| Anal pain                 | 1             | -        | -        | -          | -         | -        | -        | - |
| Ascites                   | <1            | -        | -        | -          | -         | 1        | -        | - |
| Bloating                  | 5             | -        | -        | -          | 1         | -        | -        | - |
| Cheilitis                 | <1            | -        | -        | -          | -         | -        | -        | - |
| Colitis                   | 1             | 1        | -        | -          | -         | 1        | -        | - |
| Colonic perforation       | -             | -        | <1       | -          | -         | -        | -        | - |
| Colonic ulcer             | <1            | -        | -        | -          | -         | -        | -        | - |
| Constipation              | 20            | -        | -        | -          | 32        | -        | -        | - |
| Dental caries             | 1             | <1       | -        | -          | -         | -        | -        | - |
| Diarrhea                  | 53            | 5        | -        | -          | 25        | 1        | -        | - |
| Dry mouth                 | 10            | -        | -        | -          | 2         | -        | -        | - |
| Dyspepsia                 | 14            | -        | -        | -          | 3         | -        | -        | - |
| Dysphagia                 | 5             | <1       | -        | -          | 1         | -        | -        | - |
| Enterocolitis             | 1             | -        | -        | -          | -         | -        | -        | - |
| Esophageal pain           | 1             | -        | -        | -          | -         | -        | -        | - |
| Esophageal ulcer          | 1             | -        | -        | -          | -         | -        | -        | - |
| Esophagitis               | 2             | -        | -        | -          | -         | -        | -        | - |
| Flatulence                | 6             | -        | -        | -          | 1         | -        | -        | - |
| Gastric hemorrhage        | -             | <1       | -        | -          | -         | -        | -        | - |
| Gastric ulcer             | <1            | -        | -        | -          | 1         | -        | -        | - |

| Toxicity Type                               | Treatment Arm |          |          |          |            |          |          |          |
|---------------------------------------------|---------------|----------|----------|----------|------------|----------|----------|----------|
|                                             | A (n=352)     |          |          |          | B (n=158)  |          |          |          |
|                                             | Grade         |          |          |          | Grade      |          |          |          |
|                                             | 1,2<br>(%)    | 3<br>(%) | 4<br>(%) | 5<br>(%) | 1,2<br>(%) | 3<br>(%) | 4<br>(%) | 5<br>(%) |
| Gastritis                                   | 3             | -        | -        | -        | -          | -        | -        | -        |
| Gastrointestinal disorders - Other, specify | 16            | <1       | -        | -        | 3          | -        | -        | -        |
| Gastrointestinal pain                       | 1             | -        | -        | -        | -          | -        | -        | -        |
| Hemorrhoids                                 | 5             | -        | -        | -        | 1          | -        | -        | -        |
| Lip pain                                    | 1             | -        | -        | -        | 1          | -        | -        | -        |
| Mucositis oral                              | 19            | 1        | -        | -        | 7          | 1        | -        | -        |
| Nausea                                      | 44            | 1        | -        | -        | 63         | 1        | -        | -        |
| Oral hemorrhage                             | 2             | -        | -        | -        | 1          | -        | -        | -        |
| Oral pain                                   | 4             | -        | -        | -        | 4          | -        | -        | -        |
| Pancreatitis                                | -             | <1       | -        | -        | -          | -        | -        | -        |
| Periodontal disease                         | <1            | -        | -        | -        | -          | -        | -        | -        |
| Proctitis                                   | 1             | -        | -        | -        | -          | -        | -        | -        |
| Rectal fistula                              | <1            | -        | -        | -        | -          | -        | -        | -        |
| Rectal hemorrhage                           | 2             | -        | -        | -        | 1          | -        | -        | -        |
| Rectal pain                                 | <1            | -        | -        | -        | -          | -        | -        | -        |
| Small intestinal obstruction                | <1            | -        | -        | -        | -          | -        | -        | -        |
| Stomach pain                                | 2             | <1       | -        | -        | 1          | -        | -        | -        |
| Toothache                                   | 2             | -        | -        | -        | 1          | -        | -        | -        |
| Vomiting                                    | 20            | 3        | -        | -        | 28         | -        | -        | -        |
| Lower gastrointestinal hemorrhage           | 4             | -        | -        | -        | 1          | -        | -        | -        |
| Oral dysesthesia                            | 1             | -        | -        | -        | 1          | -        | -        | -        |
| Anal hemorrhage                             | 1             | -        | -        | -        | -          | -        | -        | -        |
| Upper gastrointestinal hemorrhage           | 1             | 1        | -        | -        | -          | -        | -        | -        |
| Hemorrhoidal hemorrhage                     | 1             | -        | -        | -        | -          | -        | -        | -        |
| Small intestinal mucositis                  | -             | -        | -        | -        | 1          | -        | -        | -        |
| Gastroesophageal reflux disease             | 17            | -        | -        | -        | 7          | -        | -        | -        |
| Chills                                      | 13            | <1       | -        | -        | 16         | 1        | -        | -        |
| Death NOS                                   | -             | -        | -        | 1        | -          | -        | -        | 1        |
| Edema face                                  | 2             | -        | -        | -        | 2          | -        | -        | -        |



| Toxicity Type                                                         | Treatment Arm |          |          |          |            |          |          |          |
|-----------------------------------------------------------------------|---------------|----------|----------|----------|------------|----------|----------|----------|
|                                                                       | A (n=352)     |          |          |          | B (n=158)  |          |          |          |
|                                                                       | Grade         |          |          |          | Grade      |          |          |          |
|                                                                       | 1,2<br>(%)    | 3<br>(%) | 4<br>(%) | 5<br>(%) | 1,2<br>(%) | 3<br>(%) | 4<br>(%) | 5<br>(%) |
| Facial pain                                                           | 1             | -        | -        | -        | -          | -        | -        | -        |
| Fatigue                                                               | 82            | 3        | -        | -        | 77         | 3        | -        | -        |
| Fever                                                                 | 30            | 1        | <1       | -        | 27         | 1        | -        | -        |
| Flu like symptoms                                                     | 10            | 1        | -        | -        | 3          | -        | -        | -        |
| Gait disturbance                                                      | 1             | -        | -        | -        | 1          | -        | -        | -        |
| General disorders and administration site conditions - Other, specify | 15            | <1       | -        | -        | 4          | -        | -        | -        |
| Injection site reaction                                               | 1             | -        | -        | -        | 1          | -        | -        | -        |
| Irritability                                                          | <1            | -        | -        | -        | -          | -        | -        | -        |
| Malaise                                                               | 4             | -        | -        | -        | 3          | -        | -        | -        |
| Multi-organ failure                                                   | -             | -        | -        | <1       | -          | -        | -        | -        |
| Pain                                                                  | 26            | 2        | -        | -        | 8          | -        | -        | -        |
| Edema limbs                                                           | 33            | 1        | -        | -        | 17         | -        | -        | -        |
| Infusion related reaction                                             | 9             | -        | <1       | -        | 25         | 1        | -        | -        |
| Neck edema                                                            | -             | -        | -        | -        | 1          | -        | -        | -        |
| Edema trunk                                                           | 1             | -        | -        | -        | 1          | -        | -        | -        |
| Localized edema                                                       | 9             | -        | -        | -        | 3          | -        | -        | -        |
| Non-cardiac chest pain                                                | 11            | <1       | -        | -        | 3          | 1        | -        | -        |
| Infusion site extravasation                                           | <1            | -        | -        | -        | 1          | -        | -        | -        |
| Cholecystitis                                                         | <1            | 1        | -        | -        | -          | 1        | -        | -        |
| Hepatobiliary disorders - Other, specify                              | 2             | -        | -        | -        | -          | -        | -        | -        |
| Bile duct stenosis                                                    | <1            | -        | -        | -        | -          | -        | -        | -        |
| Allergic reaction                                                     | 2             | <1       | -        | -        | 2          | -        | -        | -        |
| Immune system disorders - Other, specify                              | 2             | 1        | -        | -        | 1          | 1        | -        | -        |
| Autoimmune disorder                                                   | -             | -        | -        | -        | 1          | -        | -        | -        |
| Appendicitis                                                          | -             | 1        | -        | -        | -          | -        | -        | -        |
| Bladder infection                                                     | 1             | <1       | -        | -        | -          | -        | -        | -        |
| Breast infection                                                      | -             | -        | -        | -        | 1          | -        | -        | -        |
| Catheter related infection                                            | -             | <1       | -        | -        | -          | -        | -        | -        |
| Conjunctivitis infective                                              | 1             | -        | -        | -        | -          | -        | -        | -        |

| Toxicity Type                                | Treatment Arm |          |          |            |           |          |          |   |
|----------------------------------------------|---------------|----------|----------|------------|-----------|----------|----------|---|
|                                              | A (n=352)     |          |          |            | B (n=158) |          |          |   |
|                                              | Grade         |          |          |            | Grade     |          |          |   |
| 1,2<br>(%)                                   | 3<br>(%)      | 4<br>(%) | 5<br>(%) | 1,2<br>(%) | 3<br>(%)  | 4<br>(%) | 5<br>(%) |   |
| Encephalitis infection                       | -             | -        | -        | -          | -         | 1        | -        | - |
| Eye infection                                | 1             | -        | -        | -          | -         | -        | -        | - |
| Infections and infestations - Other, specify | 16            | 5        | 1        | 1          | 4         | 1        | -        | - |
| Joint infection                              | 1             | <1       | -        | -          | -         | -        | -        | - |
| Kidney infection                             | -             | <1       | -        | -          | -         | -        | -        | - |
| Otitis externa                               | 1             | -        | -        | -          | 1         | -        | -        | - |
| Otitis media                                 | 4             | -        | -        | -          | 1         | -        | -        | - |
| Paronychia                                   | 2             | -        | -        | -          | -         | -        | -        | - |
| Pharyngitis                                  | 3             | -        | -        | -          | -         | -        | -        | - |
| Rash pustular                                | 1             | -        | -        | -          | -         | -        | -        | - |
| Salivary gland infection                     | <1            | -        | -        | -          | -         | -        | -        | - |
| Sepsis                                       | -             | -        | 1        | <1         | -         | -        | 3        | 1 |
| Sinusitis                                    | 11            | <1       | -        | -          | 4         | 1        | -        | - |
| Skin infection                               | 14            | 2        | -        | -          | 1         | 1        | -        | - |
| Upper respiratory infection                  | 34            | 1        | <1       | -          | 17        | 2        | -        | - |
| Urinary tract infection                      | 9             | 2        | -        | -          | 2         | 1        | -        | - |
| Vaginal infection                            | 1             | -        | -        | -          | 1         | -        | -        | - |
| Wound infection                              | 1             | -        | -        | -          | -         | -        | -        | - |
| Tooth infection                              | 3             | 1        | -        | -          | 1         | -        | -        | - |
| Prostate infection                           | 1             | -        | -        | -          | 1         | -        | -        | - |
| Lymph gland infection                        | -             | 1        | -        | -          | -         | -        | -        | - |
| Bronchial infection                          | 4             | -        | -        | -          | 1         | -        | -        | - |
| Phlebitis infective                          | <1            | -        | -        | -          | -         | -        | -        | - |
| Esophageal infection                         | <1            | -        | -        | -          | -         | -        | -        | - |
| Enterocolitis infectious                     | <1            | 1        | -        | -          | -         | 1        | -        | - |
| Rhinitis infective                           | 1             | -        | -        | -          | 1         | -        | -        | - |
| Bone infection                               | -             | <1       | -        | -          | -         | -        | -        | - |
| Lung infection                               | 10            | 5        | <1       | -          | 3         | 4        | -        | - |
| Nail infection                               | 4             | <1       | -        | -          | -         | -        | -        | - |

| Toxicity Type                                                   | Treatment Arm |          |          |            |           |          |          |   |
|-----------------------------------------------------------------|---------------|----------|----------|------------|-----------|----------|----------|---|
|                                                                 | A (n=352)     |          |          |            | B (n=158) |          |          |   |
|                                                                 | Grade         |          |          |            | Grade     |          |          |   |
| 1,2<br>(%)                                                      | 3<br>(%)      | 4<br>(%) | 5<br>(%) | 1,2<br>(%) | 3<br>(%)  | 4<br>(%) | 5<br>(%) |   |
| Penile infection                                                | -             | <1       | -        | -          | 1         | -        | -        | - |
| Scrotal infection                                               | -             | 1        | -        | -          | -         | -        | -        | - |
| Soft tissue infection                                           | 1             | 1        | <1       | -          | -         | -        | -        | - |
| Lip infection                                                   | 1             | -        | -        | -          | -         | -        | -        | - |
| Mucosal infection                                               | 1             | -        | -        | -          | -         | -        | -        | - |
| Peripheral nerve infection                                      | <1            | -        | -        | -          | -         | -        | -        | - |
| Papulopustular rash                                             | 3             | -        | <1       | -          | -         | -        | -        | - |
| Ankle fracture                                                  | 1             | -        | -        | -          | -         | -        | -        | - |
| Arterial injury                                                 | -             | 1        | -        | -          | -         | -        | -        | - |
| Bruising                                                        | 38            | -        | -        | -          | 4         | -        | -        | - |
| Burn                                                            | 1             | -        | -        | -          | -         | -        | -        | - |
| Fall                                                            | 4             | 1        | -        | -          | 4         | 1        | -        | - |
| Fracture                                                        | 4             | 1        | -        | -          | 1         | -        | -        | - |
| Hip fracture                                                    | <1            | -        | -        | -          | -         | -        | -        | - |
| Injury, poisoning and procedural complications - Other, specify | 5             | <1       | -        | -          | 3         | -        | -        | - |
| Radiation recall reaction (dermatologic)                        | <1            | -        | -        | -          | -         | -        | -        | - |
| Spinal fracture                                                 | <1            | <1       | -        | -          | -         | -        | -        | - |
| Wound dehiscence                                                | -             | <1       | -        | -          | -         | -        | -        | - |
| Wrist fracture                                                  | <1            | -        | -        | -          | -         | -        | -        | - |
| Wound complication                                              | 1             | -        | -        | -          | -         | -        | -        | - |
| Intraoperative hemorrhage                                       | -             | <1       | -        | -          | -         | -        | -        | - |
| Postoperative hemorrhage                                        | 1             | -        | -        | -          | -         | -        | -        | - |
| Dermatitis radiation                                            | <1            | -        | -        | -          | -         | -        | -        | - |
| Urostomy obstruction                                            | -             | <1       | -        | -          | -         | -        | -        | - |
| Activated partial thromboplastin time prolonged                 | 1             | -        | -        | -          | 1         | -        | -        | - |
| Alanine aminotransferase increased                              | 22            | 2        | 1        | -          | 19        | 1        | -        | - |
| Alkaline phosphatase increased                                  | 19            | 1        | -        | -          | 21        | -        | -        | - |
| Aspartate aminotransferase increased                            | 32            | 3        | 1        | -          | 30        | 1        | -        | - |
| Blood bilirubin increased                                       | 30            | 4        | <1       | -          | 18        | -        | -        | - |

| Toxicity Type                   | Treatment Arm |          |          |          |            |          |          |          |
|---------------------------------|---------------|----------|----------|----------|------------|----------|----------|----------|
|                                 | A (n=352)     |          |          |          | B (n=158)  |          |          |          |
|                                 | Grade         |          |          |          | Grade      |          |          |          |
|                                 | 1,2<br>(%)    | 3<br>(%) | 4<br>(%) | 5<br>(%) | 1,2<br>(%) | 3<br>(%) | 4<br>(%) | 5<br>(%) |
| Blood corticotrophin decreased  | <1            | -        | -        | -        | -          | -        | -        | -        |
| Cardiac troponin I increased    | 1             | -        | -        | -        | -          | -        | -        | -        |
| CD4 lymphocytes decreased       | <1            | -        | -        | -        | 1          | 1        | -        | -        |
| Cholesterol high                | 5             | -        | -        | -        | -          | -        | -        | -        |
| CPK increased                   | 2             | -        | <1       | -        | -          | -        | -        | -        |
| Creatinine increased            | 42            | 1        | <1       | -        | 22         | 1        | -        | -        |
| INR increased                   | <1            | -        | -        | -        | -          | -        | -        | -        |
| Investigations - Other, specify | 13            | 1        | -        | -        | 3          | -        | -        | -        |
| Lipase increased                | 1             | 1        | <1       | -        | -          | -        | -        | -        |
| Lymphocyte count decreased      | 24            | 10       | 2        | -        | 12         | 36       | 33       | -        |
| Lymphocyte count increased      | 15            | 64       | -        | -        | 12         | 51       | -        | -        |
| Neutrophil count decreased      | 21            | 15       | 20       | -        | 22         | 22       | 25       | -        |
| Platelet count decreased        | 59            | 4        | 3        | -        | 61         | 11       | 7        | -        |
| Serum amylase increased         | <1            | -        | <1       | -        | -          | -        | -        | -        |
| Weight gain                     | 16            | 2        | -        | -        | 5          | -        | -        | -        |
| Weight loss                     | 9             | <1       | -        | -        | 7          | -        | -        | -        |
| White blood cell decreased      | 24            | 7        | 1        | -        | 37         | 25       | 16       | -        |
| Ejection fraction decreased     | -             | 1        | -        | -        | -          | -        | -        | -        |
| Hemoglobin increased            | 1             | <1       | -        | -        | 1          | -        | -        | -        |
| GGT increased                   | <1            | <1       | -        | -        | -          | -        | -        | -        |
| Alcohol intolerance             | -             | <1       | -        | -        | -          | -        | -        | -        |
| Anorexia                        | 18            | -        | -        | -        | 20         | 1        | -        | -        |
| Dehydration                     | 3             | 1        | -        | -        | 5          | -        | -        | -        |
| Hypercalcemia                   | 4             | -        | 1        | -        | 3          | -        | -        | -        |
| Hyperglycemia                   | 28            | 5        | 1        | -        | 18         | 6        | -        | -        |
| Hyperkalemia                    | 16            | 2        | -        | -        | 6          | 1        | -        | -        |
| Hypermagnesemia                 | 1             | -        | -        | -        | 1          | -        | -        | -        |
| Hypernatremia                   | 7             | -        | -        | -        | 3          | -        | -        | -        |
| Hypertriglyceridemia            | 3             | -        | -        | -        | -          | -        | -        | -        |

| Toxicity Type                                                   | Treatment Arm |          |          |            |           |          |          |   |
|-----------------------------------------------------------------|---------------|----------|----------|------------|-----------|----------|----------|---|
|                                                                 | A (n=352)     |          |          |            | B (n=158) |          |          |   |
|                                                                 | Grade         |          |          |            | Grade     |          |          |   |
| 1,2<br>(%)                                                      | 3<br>(%)      | 4<br>(%) | 5<br>(%) | 1,2<br>(%) | 3<br>(%)  | 4<br>(%) | 5<br>(%) |   |
| Hyperuricemia                                                   | 18            | 1        | 1        | -          | 5         | -        | -        | - |
| Hypoalbuminemia                                                 | 15            | 1        | -        | -          | 7         | 1        | 1        | - |
| Hypocalcemia                                                    | 26            | <1       | -        | -          | 22        | 1        | -        | - |
| Hypoglycemia                                                    | 10            | 1        | -        | -          | 4         | -        | 1        | - |
| Hypokalemia                                                     | 15            | 1        | -        | -          | 10        | 1        | -        | - |
| Hypomagnesemia                                                  | 4             | -        | -        | -          | 3         | -        | -        | - |
| Hyponatremia                                                    | 14            | 5        | -        | -          | 10        | 2        | -        | - |
| Hypophosphatemia                                                | 5             | 2        | -        | -          | 9         | -        | -        | - |
| Metabolism and nutrition disorders - Other, specify             | 6             | 1        | -        | -          | 3         | -        | -        | - |
| Obesity                                                         | -             | <1       | 1        | -          | 1         | 1        | 1        | - |
| Tumor lysis syndrome                                            | -             | 1        | -        | -          | -         | 1        | -        | - |
| Glucose intolerance                                             | 2             | <1       | -        | -          | 1         | -        | -        | - |
| Arthralgia                                                      | 39            | 6        | -        | -          | 8         | 1        | -        | - |
| Arthritis                                                       | 9             | -        | -        | -          | 1         | -        | -        | - |
| Back pain                                                       | 27            | 2        | -        | -          | 10        | 1        | -        | - |
| Bone pain                                                       | 4             | <1       | -        | -          | 5         | -        | -        | - |
| Chest wall pain                                                 | 2             | -        | -        | -          | 1         | -        | -        | - |
| Exostosis                                                       | <1            | -        | -        | -          | -         | -        | -        | - |
| Flank pain                                                      | 4             | <1       | -        | -          | -         | 1        | -        | - |
| Joint effusion                                                  | 1             | -        | -        | -          | -         | -        | -        | - |
| Musculoskeletal and connective tissue disorder - Other, specify | 25            | 1        | -        | -          | 4         | -        | -        | - |
| Myalgia                                                         | 46            | 2        | -        | -          | 24        | 1        | -        | - |
| Neck pain                                                       | 7             | <1       | -        | -          | 3         | -        | -        | - |
| Osteoporosis                                                    | 2             | -        | -        | -          | 1         | -        | -        | - |
| Pain in extremity                                               | 27            | 2        | -        | -          | 6         | -        | -        | - |
| Buttock pain                                                    | 1             | -        | -        | -          | -         | -        | -        | - |
| Joint range of motion decreased                                 | 1             | -        | -        | -          | -         | -        | -        | - |
| Generalized muscle weakness                                     | 7             | -        | -        | -          | 3         | -        | -        | - |
| Muscle weakness lower limb                                      | 2             | -        | -        | -          | 1         | -        | -        | - |

| Toxicity Type                                                                        | Treatment Arm |          |          |          |            |          |          |          |
|--------------------------------------------------------------------------------------|---------------|----------|----------|----------|------------|----------|----------|----------|
|                                                                                      | A (n=352)     |          |          |          | B (n=158)  |          |          |          |
|                                                                                      | Grade         |          |          |          | Grade      |          |          |          |
|                                                                                      | 1,2<br>(%)    | 3<br>(%) | 4<br>(%) | 5<br>(%) | 1,2<br>(%) | 3<br>(%) | 4<br>(%) | 5<br>(%) |
| Muscle weakness left-sided                                                           | <1            | -        | -        | -        | -          | -        | -        | -        |
| Muscle weakness right-sided                                                          | -             | <1       | -        | -        | -          | -        | -        | -        |
| Muscle weakness upper limb                                                           | 1             | -        | -        | -        | -          | -        | -        | -        |
| Neoplasms benign, malignant and unspecified (incl cysts and polyps) - Other, specify | 13            | 3        | <1       | -        | 2          | 2        | -        | -        |
| Leukemia secondary to oncology chemotherapy                                          | -             | -        | -        | -        | -          | -        | -        | 1        |
| Treatment related secondary malignancy                                               | -             | 2        | -        | -        | -          | 1        | -        | 1        |
| Akathisia                                                                            | -             | -        | -        | -        | 1          | -        | -        | -        |
| Amnesia                                                                              | 1             | -        | -        | -        | -          | -        | -        | -        |
| Ataxia                                                                               | 1             | -        | -        | -        | -          | -        | -        | -        |
| Cognitive disturbance                                                                | <1            | 1        | -        | -        | 1          | -        | -        | -        |
| Concentration impairment                                                             | 1             | -        | -        | -        | 1          | -        | -        | -        |
| Dizziness                                                                            | 23            | 1        | -        | -        | 13         | 1        | -        | -        |
| Dysarthria                                                                           | 1             | -        | -        | -        | -          | -        | -        | -        |
| Dysgeusia                                                                            | 7             | -        | -        | -        | 6          | -        | -        | -        |
| Dysphasia                                                                            | 1             | <1       | -        | -        | 1          | -        | -        | -        |
| Encephalopathy                                                                       | -             | <1       | -        | -        | -          | 1        | -        | -        |
| Headache                                                                             | 44            | 1        | -        | -        | 28         | 1        | -        | -        |
| Intracranial hemorrhage                                                              | -             | -        | <1       | -        | -          | -        | -        | -        |
| Lethargy                                                                             | 1             | -        | -        | -        | 1          | -        | -        | -        |
| Memory impairment                                                                    | 5             | -        | -        | -        | 3          | -        | -        | -        |
| Movements involuntary                                                                | <1            | -        | -        | -        | -          | -        | -        | -        |
| Nervous system disorders - Other, specify                                            | 4             | <1       | -        | -        | 1          | -        | -        | -        |
| Neuralgia                                                                            | 1             | <1       | -        | -        | -          | 1        | -        | -        |
| Paresthesia                                                                          | 7             | <1       | -        | -        | 4          | -        | -        | -        |
| Peripheral motor neuropathy                                                          | 2             | -        | -        | -        | 3          | -        | -        | -        |
| Peripheral sensory neuropathy                                                        | 21            | 1        | -        | -        | 10         | 1        | -        | -        |
| Presyncope                                                                           | 2             | -        | -        | -        | 2          | -        | -        | -        |
| Seizure                                                                              | <1            | <1       | -        | -        | -          | -        | -        | -        |

| Toxicity Type                                                   | Treatment Arm |          |          |          |            |          |          |          |
|-----------------------------------------------------------------|---------------|----------|----------|----------|------------|----------|----------|----------|
|                                                                 | A (n=352)     |          |          |          | B (n=158)  |          |          |          |
|                                                                 | Grade         |          |          |          | Grade      |          |          |          |
|                                                                 | 1,2<br>(%)    | 3<br>(%) | 4<br>(%) | 5<br>(%) | 1,2<br>(%) | 3<br>(%) | 4<br>(%) | 5<br>(%) |
| Sinus pain                                                      | 1             | -        | -        | -        | 1          | -        | -        | -        |
| Somnolence                                                      | 1             | -        | -        | -        | 1          | -        | -        | -        |
| Spasticity                                                      | 1             | -        | -        | -        | -          | -        | -        | -        |
| Stroke                                                          | 1             | 1        | -        | -        | -          | 1        | -        | -        |
| Syncope                                                         | -             | 3        | -        | -        | -          | 2        | -        | -        |
| Transient ischemic attacks                                      | <1            | -        | -        | -        | -          | -        | -        | -        |
| Tremor                                                          | 2             | -        | -        | -        | 1          | -        | -        | -        |
| Vasovagal reaction                                              | -             | -        | -        | -        | -          | 1        | -        | -        |
| Facial muscle weakness                                          | <1            | -        | -        | -        | -          | -        | -        | -        |
| Radiculitis                                                     | 1             | -        | -        | -        | -          | -        | -        | -        |
| Dysesthesia                                                     | <1            | -        | -        | -        | -          | -        | -        | -        |
| Pregnancy, puerperium and perinatal conditions - Other, specify | -             | <1       | -        | -        | -          | -        | -        | -        |
| Agitation                                                       | 1             | -        | -        | -        | 2          | -        | -        | -        |
| Anxiety                                                         | 16            | 1        | -        | -        | 11         | -        | -        | -        |
| Confusion                                                       | 2             | 1        | -        | -        | 1          | 1        | -        | -        |
| Depression                                                      | 14            | 1        | <1       | -        | 6          | -        | -        | -        |
| Hallucinations                                                  | -             | -        | -        | -        | -          | -        | 1        | -        |
| Insomnia                                                        | 17            | 1        | -        | -        | 18         | 1        | -        | -        |
| Libido decreased                                                | 1             | -        | -        | -        | -          | -        | -        | -        |
| Mania                                                           | <1            | -        | -        | -        | -          | -        | -        | -        |
| Psychiatric disorders - Other, specify                          | 1             | -        | -        | -        | 1          | -        | -        | -        |
| Psychosis                                                       | -             | -        | <1       | -        | -          | -        | -        | -        |
| Restlessness                                                    | 1             | -        | -        | -        | -          | -        | -        | -        |
| Suicidal ideation                                               | -             | <1       | -        | -        | -          | -        | -        | -        |
| Suicide attempt                                                 | -             | -        | -        | <1       | -          | -        | -        | -        |
| Hematuria                                                       | 18            | 1        | -        | -        | 3          | -        | -        | -        |
| Hemoglobinuria                                                  | <1            | -        | -        | -        | -          | -        | -        | -        |
| Proteinuria                                                     | 2             | -        | -        | -        | 2          | -        | -        | -        |
| Renal and urinary disorders - Other, specify                    | 6             | -        | -        | -        | 1          | -        | -        | -        |

| Toxicity Type                                             | Treatment Arm |          |          |            |           |          |          |   |
|-----------------------------------------------------------|---------------|----------|----------|------------|-----------|----------|----------|---|
|                                                           | A (n=352)     |          |          |            | B (n=158) |          |          |   |
|                                                           | Grade         |          |          |            | Grade     |          |          |   |
| 1,2<br>(%)                                                | 3<br>(%)      | 4<br>(%) | 5<br>(%) | 1,2<br>(%) | 3<br>(%)  | 4<br>(%) | 5<br>(%) |   |
| Renal calculi                                             | 2             | 2        | -        | -          | -         | -        | -        | - |
| Renal colic                                               | 1             | -        | -        | -          | -         | -        | -        | - |
| Renal hemorrhage                                          | <1            | <1       | -        | -          | -         | -        | -        | - |
| Urinary frequency                                         | 7             | -        | -        | -          | 9         | -        | -        | - |
| Urinary incontinence                                      | 1             | -        | -        | -          | 1         | -        | -        | - |
| Urinary retention                                         | 2             | <1       | -        | -          | -         | -        | -        | - |
| Urinary urgency                                           | 3             | -        | -        | -          | 1         | -        | -        | - |
| Urine discoloration                                       | 1             | -        | -        | -          | -         | -        | -        | - |
| Bladder spasm                                             | 1             | -        | -        | -          | -         | -        | -        | - |
| Urinary tract obstruction                                 | -             | <1       | -        | -          | -         | -        | -        | - |
| Urinary tract pain                                        | 2             | -        | -        | -          | 1         | 1        | -        | - |
| Cystitis noninfective                                     | <1            | -        | -        | -          | 1         | -        | -        | - |
| Chronic kidney disease                                    | 5             | <1       | -        | -          | 2         | -        | -        | - |
| Acute kidney injury                                       | 1             | <1       | -        | -          | 1         | 1        | -        | - |
| Breast pain                                               | 1             | -        | -        | -          | 1         | -        | -        | - |
| Genital edema                                             | 1             | -        | -        | -          | -         | -        | -        | - |
| Gynecomastia                                              | <1            | -        | -        | -          | -         | -        | -        | - |
| Irregular menstruation                                    | 1             | <1       | -        | -          | -         | -        | -        | - |
| Menorrhagia                                               | 1             | -        | -        | -          | 1         | -        | -        | - |
| Pelvic pain                                               | 1             | <1       | -        | -          | -         | -        | -        | - |
| Penile pain                                               | <1            | -        | -        | -          | -         | -        | -        | - |
| Prostatic pain                                            | 1             | -        | -        | -          | -         | -        | -        | - |
| Reproductive system and breast disorders - Other, specify | 3             | -        | -        | -          | 1         | -        | -        | - |
| Scrotal pain                                              | 1             | -        | -        | -          | -         | -        | -        | - |
| Testicular disorder                                       | 1             | <1       | -        | -          | -         | -        | -        | - |
| Testicular pain                                           | 1             | -        | -        | -          | -         | -        | -        | - |
| Uterine hemorrhage                                        | <1            | -        | -        | -          | -         | -        | -        | - |
| Vaginal discharge                                         | 1             | -        | -        | -          | -         | -        | -        | - |
| Vaginal dryness                                           | 1             | -        | -        | -          | -         | -        | -        | - |



| Toxicity Type                                                    | Treatment Arm |          |          |          |            |          |          |          |
|------------------------------------------------------------------|---------------|----------|----------|----------|------------|----------|----------|----------|
|                                                                  | A (n=352)     |          |          |          | B (n=158)  |          |          |          |
|                                                                  | Grade         |          |          |          | Grade      |          |          |          |
|                                                                  | 1,2<br>(%)    | 3<br>(%) | 4<br>(%) | 5<br>(%) | 1,2<br>(%) | 3<br>(%) | 4<br>(%) | 5<br>(%) |
| Vaginal hemorrhage                                               | 1             | -        | -        | -        | -          | -        | -        | -        |
| Vaginal inflammation                                             | 1             | -        | -        | -        | -          | -        | -        | -        |
| Prostatic obstruction                                            | 2             | -        | -        | -        | -          | -        | -        | -        |
| Erectile dysfunction                                             | 2             | -        | -        | -        | -          | -        | -        | -        |
| Pelvic floor muscle weakness                                     | <1            | -        | -        | -        | -          | -        | -        | -        |
| Spermatic cord hemorrhage                                        | <1            | -        | -        | -        | -          | -        | -        | -        |
| Allergic rhinitis                                                | 14            | -        | -        | -        | 3          | -        | -        | -        |
| Apnea                                                            | -             | -        | -        | -        | -          | 1        | -        | -        |
| Aspiration                                                       | -             | -        | -        | -        | 1          | -        | -        | -        |
| Atelectasis                                                      | <1            | -        | -        | -        | -          | -        | -        | -        |
| Cough                                                            | 41            | <1       | -        | -        | 26         | -        | -        | -        |
| Dyspnea                                                          | 24            | 3        | <1       | -        | 20         | 1        | -        | -        |
| Epistaxis                                                        | 10            | -        | -        | -        | 1          | 1        | -        | -        |
| Hiccups                                                          | <1            | <1       | -        | -        | 3          | -        | -        | -        |
| Hoarseness                                                       | 3             | -        | -        | -        | 2          | -        | -        | -        |
| Hypoxia                                                          | <1            | <1       | <1       | -        | 2          | -        | -        | -        |
| Nasal congestion                                                 | 16            | -        | -        | -        | 8          | -        | -        | -        |
| Pharyngolaryngeal pain                                           | <1            | -        | -        | -        | -          | -        | -        | -        |
| Pleural effusion                                                 | 2             | 1        | -        | -        | 2          | -        | -        | -        |
| Pleuritic pain                                                   | 1             | -        | -        | -        | 1          | -        | -        | -        |
| Pneumonitis                                                      | 1             | -        | -        | -        | 1          | 1        | 1        | -        |
| Postnasal drip                                                   | 6             | -        | -        | -        | 3          | -        | -        | -        |
| Productive cough                                                 | 10            | -        | -        | -        | 6          | -        | -        | -        |
| Pulmonary edema                                                  | -             | -        | <1       | -        | -          | -        | -        | -        |
| Pulmonary fibrosis                                               | <1            | -        | -        | -        | -          | -        | -        | -        |
| Respiratory failure                                              | -             | -        | 1        | <1       | -          | -        | 1        | -        |
| Respiratory, thoracic and mediastinal disorders - Other, specify | 8             | 1        | <1       | -        | 2          | -        | -        | -        |
| Sleep apnea                                                      | 2             | 1        | -        | -        | 1          | -        | -        | -        |
| Sneezing                                                         | 1             | -        | -        | -        | -          | -        | -        | -        |

| Toxicity Type                                           | Treatment Arm |          |          |            |           |          |          |   |
|---------------------------------------------------------|---------------|----------|----------|------------|-----------|----------|----------|---|
|                                                         | A (n=352)     |          |          |            | B (n=158) |          |          |   |
|                                                         | Grade         |          |          |            | Grade     |          |          |   |
| 1,2<br>(%)                                              | 3<br>(%)      | 4<br>(%) | 5<br>(%) | 1,2<br>(%) | 3<br>(%)  | 4<br>(%) | 5<br>(%) |   |
| Sore throat                                             | 15            | <1       | -        | -          | 4         | -        | -        | - |
| Voice alteration                                        | <1            | -        | -        | -          | 1         | -        | -        | - |
| Wheezing                                                | 4             | -        | -        | -          | 4         | -        | -        | - |
| Sinus disorder                                          | 1             | -        | -        | -          | 1         | -        | -        | - |
| Laryngeal inflammation                                  | <1            | -        | -        | -          | -         | -        | -        | - |
| Bronchopulmonary hemorrhage                             | <1            | -        | -        | -          | -         | -        | -        | - |
| Laryngeal hemorrhage                                    | -             | -        | -        | -          | 1         | -        | -        | - |
| Pharyngeal mucositis                                    | <1            | -        | -        | -          | -         | -        | -        | - |
| Tracheal mucositis                                      | <1            | -        | -        | -          | -         | -        | -        | - |
| Alopecia                                                | 5             | -        | -        | -          | 3         | -        | -        | - |
| Bullous dermatitis                                      | 1             | -        | -        | -          | -         | -        | -        | - |
| Dry skin                                                | 13            | <1       | -        | -          | 6         | -        | -        | - |
| Erythema multiforme                                     | 2             | -        | -        | -          | 1         | -        | -        | - |
| Hirsutism                                               | <1            | -        | -        | -          | -         | -        | -        | - |
| Hyperhidrosis                                           | 7             | -        | -        | -          | 4         | -        | -        | - |
| Nail discoloration                                      | 1             | -        | -        | -          | -         | -        | -        | - |
| Pain of skin                                            | 2             | -        | -        | -          | 1         | -        | -        | - |
| Photosensitivity                                        | -             | -        | -        | -          | 1         | -        | -        | - |
| Pruritus                                                | 14            | <1       | -        | -          | 8         | -        | -        | - |
| Purpura                                                 | 4             | -        | -        | -          | 1         | -        | -        | - |
| Rash acneiform                                          | 6             | -        | -        | -          | 1         | -        | -        | - |
| Rash maculo-papular                                     | 44            | 3        | -        | -          | 21        | 5        | -        | - |
| Skin and subcutaneous tissue disorders - Other, specify | 34            | 1        | -        | -          | 9         | 1        | -        | - |
| Skin hyperpigmentation                                  | 1             | -        | -        | -          | 1         | -        | -        | - |
| Skin hypopigmentation                                   | <1            | -        | -        | -          | -         | -        | -        | - |
| Skin ulceration                                         | 2             | <1       | <1       | -          | 1         | -        | -        | - |
| Telangiectasia                                          | <1            | -        | -        | -          | -         | -        | -        | - |
| Urticaria                                               | 2             | -        | -        | -          | -         | -        | -        | - |
| Scalp pain                                              | 1             | -        | -        | -          | -         | -        | -        | - |

| Toxicity Type                                    | Treatment Arm |          |          |          |            |          |          |          |
|--------------------------------------------------|---------------|----------|----------|----------|------------|----------|----------|----------|
|                                                  | A (n=352)     |          |          |          | B (n=158)  |          |          |          |
|                                                  | Grade         |          |          |          | Grade      |          |          |          |
|                                                  | 1,2<br>(%)    | 3<br>(%) | 4<br>(%) | 5<br>(%) | 1,2<br>(%) | 3<br>(%) | 4<br>(%) | 5<br>(%) |
| Nail loss                                        | 2             | -        | -        | -        | -          | -        | -        | -        |
| Palmar-plantar erythrodysesthesia syndrome       | 1             | -        | -        | -        | 1          | -        | -        | -        |
| Periorbital edema                                | <1            | -        | -        | -        | -          | -        | -        | -        |
| Nail ridging                                     | 3             | -        | -        | -        | -          | -        | -        | -        |
| Surgical and medical procedures - Other, specify | 3             | 3        | -        | -        | -          | -        | -        | -        |
| Flushing                                         | 2             | -        | -        | -        | 3          | -        | -        | -        |
| Hematoma                                         | 3             | 1        | -        | -        | -          | 1        | -        | -        |
| Hot flashes                                      | 12            | -        | -        | -        | 13         | -        | -        | -        |
| Hypertension                                     | 28            | 25       | 1        | -        | 16         | 8        | -        | -        |
| Hypotension                                      | 4             | <1       | -        | -        | 9          | 1        | -        | -        |
| Lymphedema                                       | 1             | -        | -        | -        | -          | -        | -        | -        |
| Phlebitis                                        | <1            | -        | -        | -        | 1          | -        | -        | -        |
| Superficial thrombophlebitis                     | <1            | -        | -        | -        | 1          | -        | -        | -        |
| Thromboembolic event                             | 2             | 1        | -        | -        | 1          | 1        | 1        | -        |
| Vascular disorders - Other, specify              | 3             | <1       | -        | -        | 2          | -        | -        | -        |
| Vasculitis                                       | <1            | -        | -        | -        | -          | -        | -        | -        |
| WORST DEGREE                                     | 5             | 63       | 29       | 3        | 7          | 42       | 49       | 3        |

Supplemental Figure 1. Overall survival by IGHV mutation status.

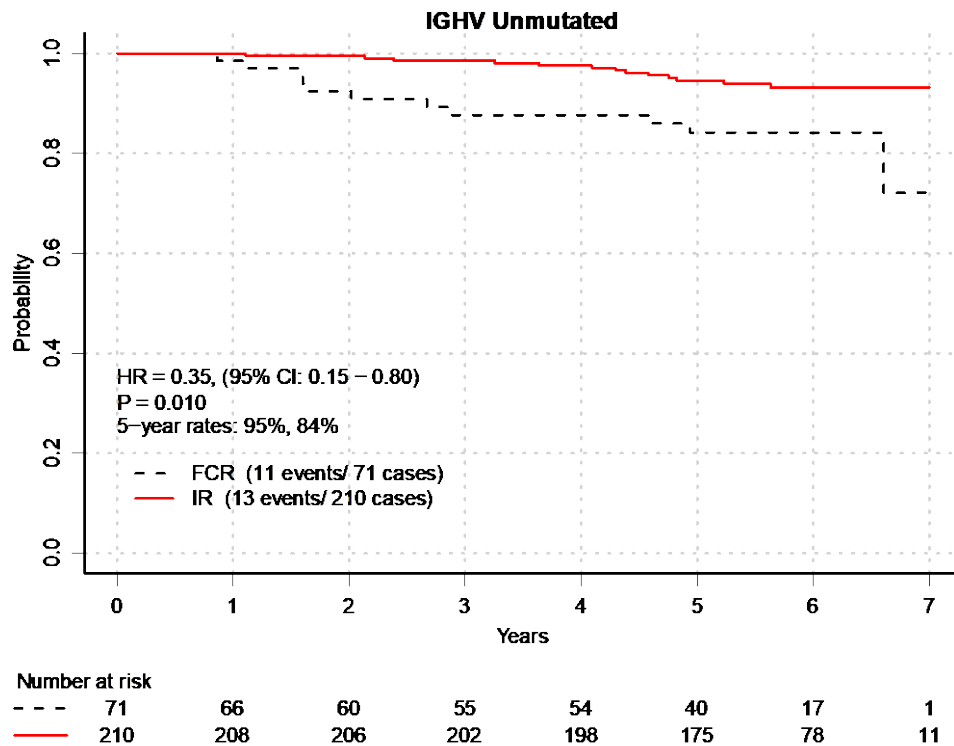

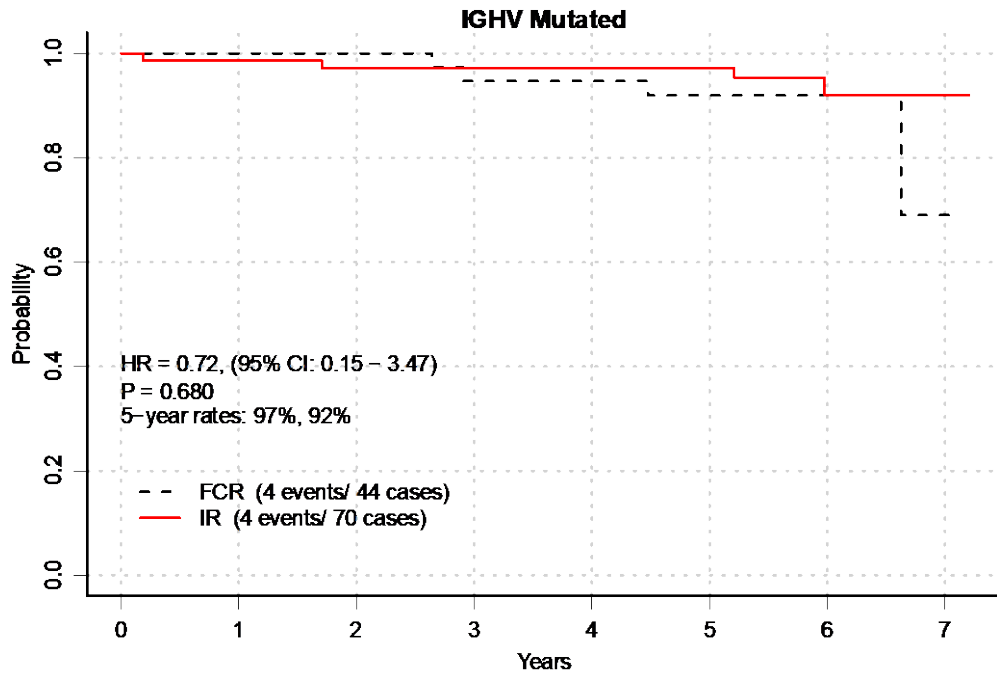

| Number at risk |    | 0  | 1  | 2  | 3  | 4  | 5  | 6  | 7 |
|----------------|----|----|----|----|----|----|----|----|---|
| --             | 44 | 44 | 41 | 39 | 35 | 35 | 29 | 16 | 1 |
| —              | 70 | 70 | 68 | 67 | 67 | 67 | 59 | 25 | 6 |

Supplemental Figure 2. Progression-free survival (PFS) after discontinuing ibrutinib by time on treatment. Includes patients on IR arm who started protocol therapy and discontinued due to reasons other than progression or death. PFS calculated from date off treatment.

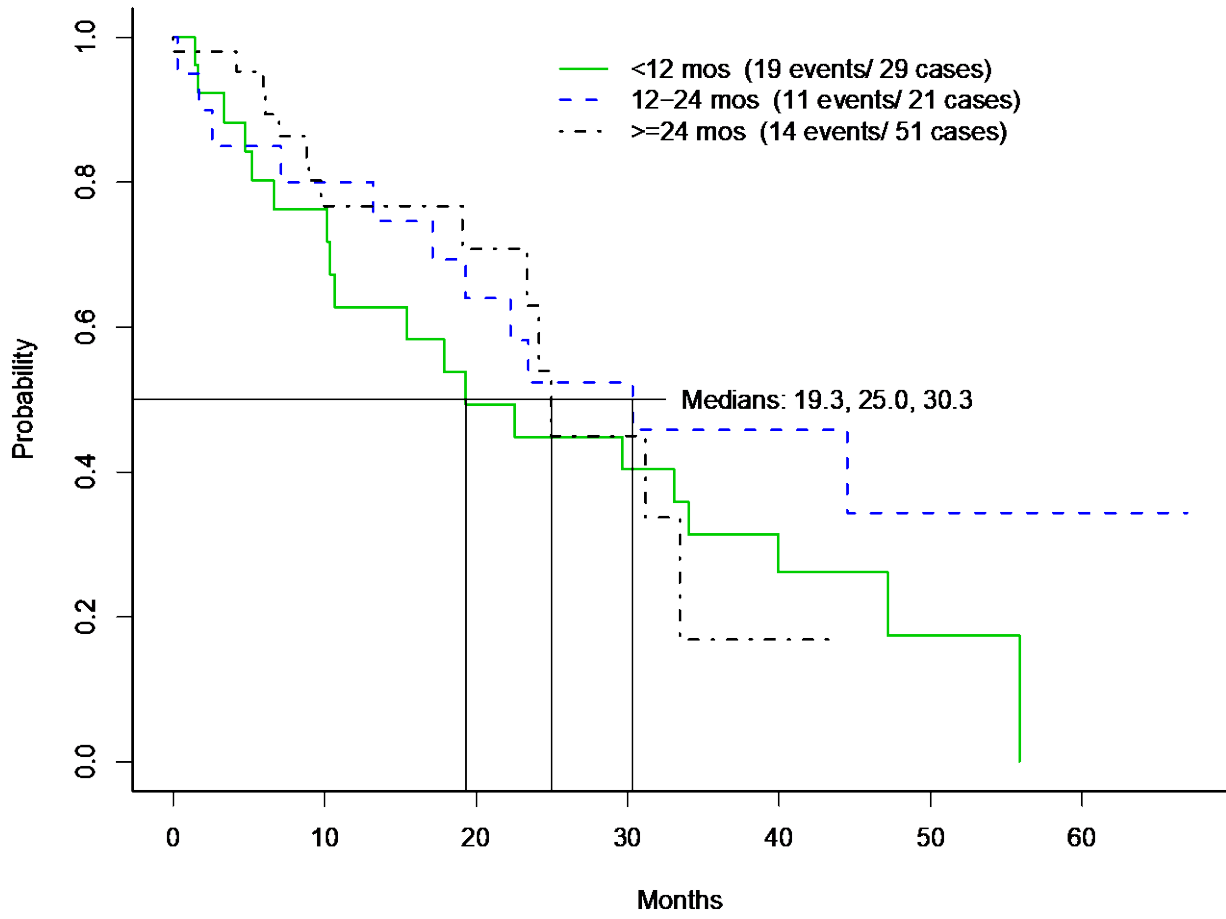

Supplement: 10.1182-2021014960_bloodbld2021014960-suppl1.pdf [file 10.1182-2021014960_bloodbld2021014960-suppl1.pdf]
